## **L-SERINE UPTAKE BY TROUT (*SALMO TRUTTA*) RED BLOOD CELLS: THE EFFECT OF ISOPROTERENOL**

BY M. A. GALLARDO, J. PLANAS AND J. SÁNCHEZ\*

*Departament de Bioquímica i Fisiologia, Unitat de Fisiologia,  
Facultat de Biologia, Diagonal 645, 08028-Barcelona, Spain*

*Accepted 14 October 1991*

### **Summary**

We studied the uptake of L-serine by trout red blood cells and the effect of a  $\beta$ -adrenergic agonist (isoproterenol) on this process. The results obtained indicate that L-serine is taken up by these cells by means of a concentrative process. The uptake seems to be mediated both by a sodium-dependent process and by a sodium-independent process. The sodium-dependent uptake is mediated by a transport system that probably belongs to the ASC system family. Isoproterenol exerts an inhibitory effect on L-serine uptake. This effect is dose-dependent. It is proposed that the inhibitory effect of isoproterenol is mediated by a rise in the intracellular sodium concentration and/or changes in cell volume.

### **Introduction**

It has been shown that red blood cells (RBCs) may play an important role in amino acid metabolism, being involved in the biosynthesis of glutathione (Ellory *et al.* 1983), interorgan transport (Christensen, 1982) and peptide degradation following amino acid efflux (Tucker and Young, 1981). Some amino acids have been implicated in the regulation of cell volume, particularly in fish red blood cells (Fincham *et al.* 1987; Goldstein and Boyd, 1978).

In all these processes, membrane transport steps appear to be central. On the basis of their  $\text{Na}^+$  dependence and substrate specificity, several amino acid transport systems have been described in RBCs (Eavenson and Christensen, 1967), as well as in other cell systems (Le Cam and Freychet, 1977; Shotwell *et al.* 1983). One of these transport systems uses L-alanine, L-serine and L-cysteine as preferred substrates and requires  $\text{Na}^+$  (Christensen *et al.* 1967; Kilberg *et al.* 1981). This system, called the ASC system, was first described in Erlich cells, but it has been found in other cells (Christensen *et al.* 1967). Interestingly, a similar system has been found in human RBCs (Young *et al.* 1983, 1988) and in rabbit reticulocytes (Thomas and Christensen, 1971), as well as in pigeon erythrocytes

\*To whom reprint requests should be addressed.

(the ASCP system; Eavenson and Christensen, 1967). However, no references have been found to the existence of a similar system in fish RBCs.

Fish RBCs are particularly sensitive to high levels of circulating catecholamines, which occur under hypoxic conditions (Tetens and Christensen, 1987) and after exhaustive exercise (Ristori and Laurent, 1985), inducing a rise in the sodium concentration inside the cells (Baroin *et al.* 1984). The cell swelling was shown to be coupled to  $\text{Na}^+/\text{H}^+$  and  $\text{Cl}^-/\text{HCO}_3^-$  exchanges under physiological conditions (Nikinmaa and Huestis, 1984). The effect also seems to be mediated by a rise in the cyclic AMP level, through the interaction of the hormone with membrane receptors of the  $\beta$  type.

In the present study, evidence is presented that an amino acid transport system similar to the ASC(P) system exists in trout RBCs and that catecholamines may alter its carrier ability by changing the internal sodium concentration.

#### Materials and methods

Brown trout (*Salmo trutta*) (body mass between 250 and 400 g) were obtained from a fish farm (Departament Medi Ambient, Generalitat de Catalunya) in the Pyrenees (Bagà, Spain) and were acclimatized to the laboratory conditions (a closed water circuit, filled with deionized water and with controlled  $[\text{NH}_4^+]$  and  $[\text{O}_2]$ , maintained at 15°C) for at least 1 week before the experiments were performed.

Blood was obtained by caudal puncture and diluted with heparinized RPMI 1640 (Sigma Co., USA). Owing to the high metabolic activity of white blood cells, these cells, as well as thrombocytes, were removed by centrifugation with Histopaque-1077 (Sigma Co., USA), following the procedure suggested by the supplier, slightly modified to obviate the high viscosity of trout blood. Once separated, the RBCs were rinsed four times with a slightly modified Cortland buffer (pH 7.4) (Houston *et al.* 1985) ( $\text{NaCl}$  141  $\text{mmol l}^{-1}$ ,  $\text{KCl}$  3.5  $\text{mmol l}^{-1}$ ,  $\text{MgSO}_4$  1  $\text{mmol l}^{-1}$ ,  $\text{NaH}_2\text{PO}_4$  3  $\text{mmol l}^{-1}$ ,  $\text{CaCl}_2$  1  $\text{mmol l}^{-1}$ , pyruvic acid 2  $\text{mmol l}^{-1}$ , Hepes 10  $\text{mmol l}^{-1}$ , bovine serum albumin 0.3 %, glucose 3  $\text{mmol l}^{-1}$ ). This buffer will be referred to as MCB. The osmolality was adjusted to 305  $\text{mosmol kg}^{-1}$ . During this process the RBCs became depleted of L-serine (data not shown). When cells were used for experiments using buffers with a different ionic composition, the whole rinsing procedure was performed using the final buffer.

$\text{U-}^{14}\text{C}$ -labelled L-serine and other chemicals were obtained from Sigma Co. (USA). 8-Bromoadenosine-3',5'-cyclic monophosphate (Br-cAMP) was from Boehringer Mannheim (Germany).

Both cells and solutions were pre-equilibrated at 15°C before the experiments were started by mixing the RBC suspension with the L-serine (1:1, v/v) to obtain the desired concentrations and a final haematocrit of about 10%. 0.04  $\mu\text{Ci}$  of  $\text{U-}^{14}\text{C}$ -labelled L-serine for each millilitre of cell suspension was added to the cold L-serine solution before mixing with cells. Incubations were performed in a

shaking bath at 15°C, using air as the gas phase. The experiments were performed in the presence of 2 mmol l<sup>-1</sup> amino-oxyacetic acid to avoid L-serine metabolism.

Radioactive L-serine uptake was stopped by diluting with MCB (1:9, v/v) containing a 10- to 50-fold excess of cold amino acid and rinsing the cells with this solution (1:9, v/v) three times; the RBCs were separated each time by centrifugation (810 g for 8 min at 4°C). Cells suspensions were deproteinized by adding sufficient ice-cold perchloric acid to obtain a final concentration of 6%. Deproteinization was developed in ice and a clear supernatant was obtained by centrifugation (1825 g for 20 min at 4°C). The radioactivity in this supernatant was measured by using a liquid scintillation counter.

Cell water content was determined gravimetrically and RBC sodium measurements were performed by flame photometry following Mahé *et al.* (1985).

Curve fitting of experimental data was performed by means of non-linear regression systems (Graph-Pad 2.0 and Sigma Plot 4.0).

## Results and discussion

### *Serine uptake by trout red blood cells*

Eukaryotic cells take up neutral amino acids by three main transport systems, A, ASC and L, as well as by other minor transport systems, Gly,  $\beta$  and N (Shotwell *et al.* 1983). These transport systems have been found in a variety of cells and tissues, including Erlich ascites tumour cells (Christensen *et al.* 1967), fish (Ballatori and Boyer, 1988) and mammalian hepatocytes (Kilberg *et al.* 1981; Le Cam and Freychet, 1977) and other tissues, although they do not seem to be present simultaneously in all cells types. Some variations of these main transport systems have been found, such as the Na<sup>+</sup>-independent asc system present in RBCs from different species (Fincham *et al.* 1985, 1990; Vadgama and Christensen, 1985).

The time course of 150  $\mu$ mol l<sup>-1</sup> L-serine uptake by RBCs in a Na<sup>+</sup>-containing medium is shown in Fig. 1. The concentration of amino acid in the intracellular water was 2.8 times higher than that outside the cell after 3 h of incubation, i.e. this amino acid is taken up in a concentrative way. Physiological values for the RBC/plasma L-serine concentration ratio range between 1.0 and 5.0, as a function of seasonal and physiological changes (M. A. Gallardo, J. Planas and J. Sánchez, unpublished data). The uptake was almost linear for 15 min and subsequent experiments used incubation times of 10 min.

The effect on the amino acid uptake of different L-serine concentrations in the incubation medium was measured in media containing either Na<sup>+</sup> or K<sup>+</sup> [potassium was substituted for sodium as the main cation in the sodium-independent experiments (Fincham *et al.* 1987)]. Fig. 2 shows that at low L-serine concentrations [below 50  $\mu$ mol l<sup>-1</sup>, i.e. approximately physiological levels, which ranged between 50 and 100  $\mu$ mol l<sup>-1</sup> (M. A. Gallardo, J. Planas and J. Sánchez, unpublished data)] the transport is mainly Na<sup>+</sup> dependent, while at higher

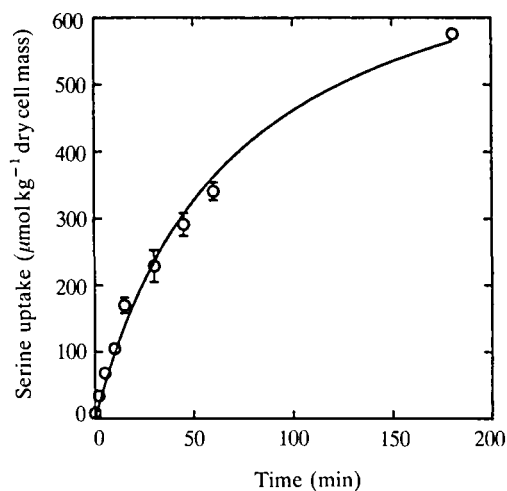

Fig. 1. Time course of L-serine uptake by trout red blood cells (RBCs). Cells were suspended in MCB and incubated for different times in the presence of  $150 \mu\text{mol l}^{-1}$  L-serine and  $2 \text{ mmol l}^{-1}$  amino-oxyacetic acid. Each point is the mean of 3–5 individual experiments. Bars are standard deviation of the mean.

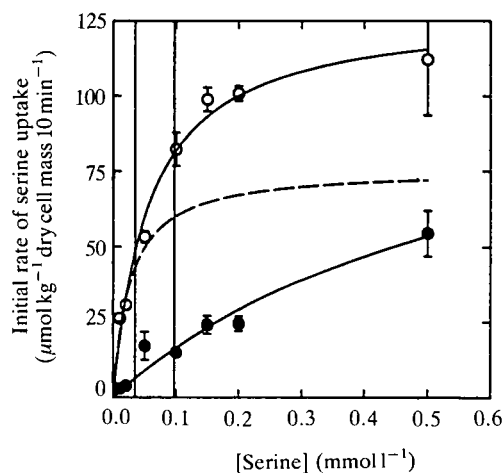

Fig. 2. Concentration dependence of L-serine uptake by trout RBCs. Initial rates were measured in the presence of buffers containing sodium ( $160 \text{ mmol l}^{-1}$ ) or potassium ( $160 \text{ mmol l}^{-1}$ ). Cells were incubated for 10 min before the uptake was stopped, as described in Materials and methods. (○) Total uptake. (●) Sodium-independent uptake. (---) Sodium-dependent uptake. The box indicates the physiological range of plasma L-serine concentrations. Each point is the mean of 3–5 individual experiments. Bars are standard deviation of the mean. Kinetic constants for  $\text{Na}^+$ -dependent L-serine uptake are given in the text.

concentrations, the  $\text{Na}^+$ -independent component becomes important, accounting for between one-quarter and one-third of the total uptake. Although it has not been tested in the present study, this sodium-independent component may be related to the presence of an asc system or an L system. The asc system has been described in hagfish (*Eptatretus stouti*) (Fincham *et al.* 1990), pigeon (Vadgama and Christensen, 1985) and horse (Fincham *et al.* 1985) RBCs, as well as in rabbit reticulocytes (Wheeler and Christensen, 1967). The L system is known to transport small amounts of L-serine in Chinese hamster ovary cells (Shotwell *et al.* 1981). When the rates of uptake in the  $\text{K}^+$ -containing medium were subtracted from those in  $\text{Na}^+$ -containing medium, essentially all of the sodium-dependent uptake was saturable. The apparent  $K_m$  of this saturable component was  $26.06 \mu\text{mol l}^{-1}$  and the  $V_{\text{max}}$  was  $75.88 \mu\text{mol kg}^{-1} \text{ dry mass } 10 \text{ min}^{-1}$ .

These results indicate that some kind of specific transport system for L-serine exists in trout RBCs and further experiments were performed to obtain information about some characteristics of this transport system. The sodium dependence of the L-serine transport was explored by modifying the external sodium concentration. This was varied between 5 and  $180 \text{ mmol l}^{-1}$ , and  $10 \mu\text{mol l}^{-1}$  L-serine was used as the initial concentration to exclude most of the sodium-independent component of the transport. The amount of L-serine taken up by the cells rose continuously as a hyperbolic function. Kinetic variables were as follows: apparent  $K_m = 122 \text{ mmol l}^{-1}$  and  $V_{\text{max}} = 23.03 \mu\text{mol kg}^{-1} \text{ dry mass } 10 \text{ min}^{-1}$  (Fig. 3).

It has been postulated that harmaline, an inhibitor of sodium cotransport systems (Sepulveda and Robinson, 1974), inhibits the human and horse erythro-

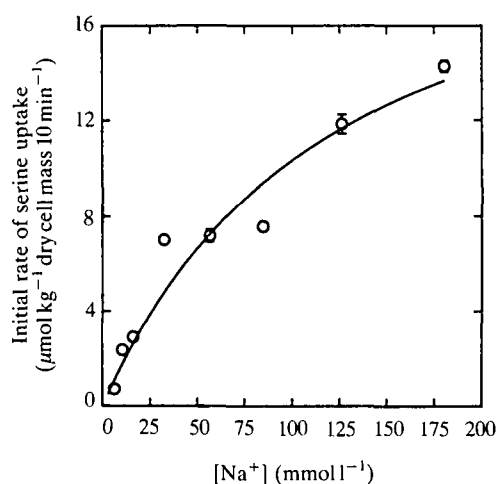

Fig. 3.  $\text{Na}^+$  dependence of L-serine uptake by trout RBCs. The amino acid concentration used was  $10 \mu\text{mol l}^{-1}$ . Potassium was used throughout to replace sodium and osmolality was maintained constant ( $305 \text{ mosmol kg}^{-1}$ ). The initial rates were measured after 10 min incubations as a function of external sodium concentration. Each point is the mean of 3–5 individual experiments. Bars are standard deviation of the mean. Kinetic constants for the uptake are given in the text.

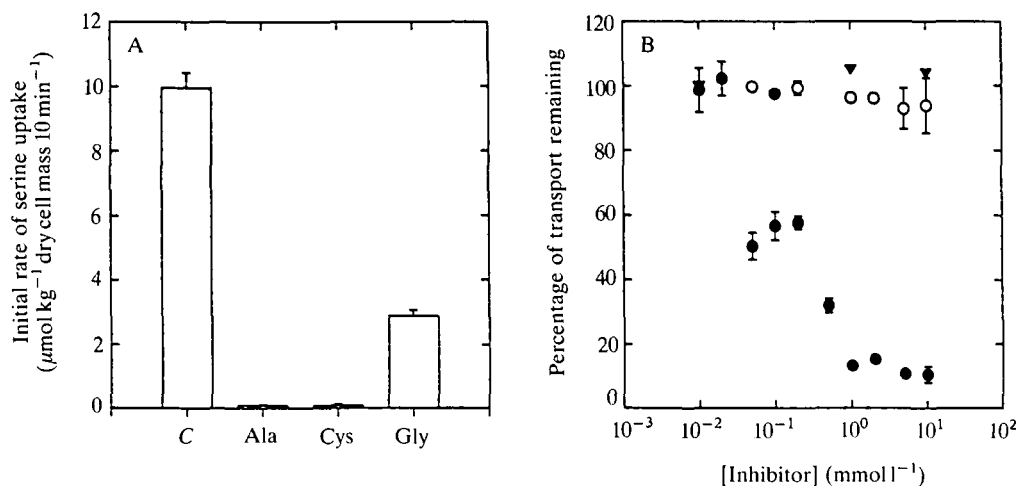

Fig. 4. Inhibition by different amino acids of the uptake of L-serine by trout RBCs. Cells were incubated for 10 min in sodium-containing medium as for the experiment shown in Fig. 1. (A) L-Serine uptake, at  $10 \mu\text{mol l}^{-1}$ , was measured in the presence of  $10 \text{ mmol l}^{-1}$  L-alanine (Ala) or L-cysteine (Cys) which, in addition to L-serine, are considered to be preferred substrates for the ASC system. The effect of  $10 \text{ mmol l}^{-1}$  glycine (Gly), which has been considered to be a substrate for this system, is also presented. C is the control. (B) Effect of variable external concentrations of L-alanine (●),  $\alpha$ -(methyl)aminoisobutyric acid (▼) and L-lysine (○) on the uptake of  $10 \mu\text{mol l}^{-1}$  L-serine. Each point is the mean of three individual experiments. Bars are standard deviation of the mean.

cyte ASC system in a noncompetitive way with respect to amino acid concentration (Young *et al.* 1988). Using  $10 \mu\text{mol l}^{-1}$  L-serine, the presence of  $5 \text{ mmol l}^{-1}$  harmaline reduced L-serine uptake by  $45 \pm 0.4\%$  (s.d.,  $N=5$ ) with respect to controls, while  $10 \mu\text{mol l}^{-1}$  harmaline had no effect on the uptake.

To investigate the substrate specificity of the L-serine transport system in trout RBCs, various amino acids were tested as inhibitors of the transport. The presence of a 1000-fold excess of either L-alanine or L-cysteine fully inhibited the uptake of L-serine ( $10 \mu\text{mol l}^{-1}$  initial concentration), while  $10 \text{ mmol l}^{-1}$  L-glycine caused a 70% inhibition (Fig. 4A). A more detailed study of the inhibiting effect of amino acids on L-serine transport was undertaken by using increasing concentrations ( $0$ – $10 \text{ mmol l}^{-1}$ ) of L-alanine (related to transport systems A and ASC),  $\alpha$ -(methyl)aminoisobutyric acid (MeAIB) (related to system A) or L-lysine [it has been reported that dibasic amino acids can act as inhibitors of the ASC system in pigeon RBCs (Eavenson and Christensen, 1967)]. According to the data shown in Fig. 4B, L-alanine showed a marked inhibitory effect, half-maximal inhibition occurring at  $160 \mu\text{mol l}^{-1}$  [as judged from curve-fitting (curve not shown)], while MeAIB had no effect and L-lysine had only a small inhibitory effect at high concentrations.

In the present study we have demonstrated that L-serine uptake by trout RBCs is mediated by a saturable high-affinity sodium-dependent transport system, as

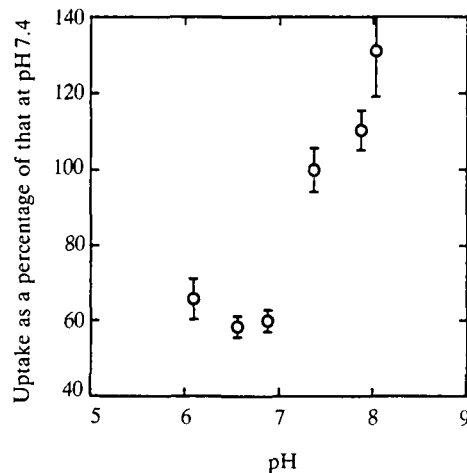

Fig. 5. Effect of extracellular pH on the rate of uptake of L-serine by trout RBCs. Cells were incubated for 10 min. Results are expressed as a percentage of the uptake measured at pH 7.4. Each point is the mean of three individual experiments. Bars are standard deviation of the mean.

well as by a sodium-independent system. The properties of the sodium-dependent transport system are similar to those of the ASC system; for example, inhibition by other neutral short-chain amino acids (alanine and cysteine); partial inhibition by glycine; only a small inhibitory effect of dibasic amino acids; and MeAIB had no effect (Shotwell *et al.* 1983).  $K_m$  values for both sodium and L-serine are near their physiological values (M. A. Gallardo, J. Planas and J. Sánchez, unpublished data). Discrimination between the A and ASC systems is difficult from a kinetic point of view, because the properties of the ASC system are very similar to those of the A system; however, this system seems to be almost inactive or nonexistent in mature RBCs (Eavenson and Christensen, 1967).

The pH dependence of the ASC system is highly variable in different cell types. In rabbit reticulocytes and erythrocytes (Winter and Christensen, 1965), as well as Ehrlich cells (Christensen *et al.* 1967), it is barely sensitive to external pH. However, the activity of this system from pigeon erythrocytes shows a marked dependence on external pH (Eavenson and Christensen, 1967). The pH dependence of L-serine ( $10 \mu\text{mol l}^{-1}$ ) uptake by trout RBCs was studied in the pH range 6–8, in a  $\text{Na}^+$ -containing medium (Fig. 5). The results showed a clear dependence of the rate of uptake on the external pH. It would be of interest to know the pH dependence of system A, if present in other fish tissues, but at present there is a lack of information on this.

#### *Effect of isoproterenol on the L-serine uptake by trout red blood cells*

Addition of catecholamines to an isotonic suspension of fish red blood cells causes the cell volume to increase, owing to a net uptake of sodium and chloride and osmotically obligated water (Baroin *et al.* 1984). It has been proposed that

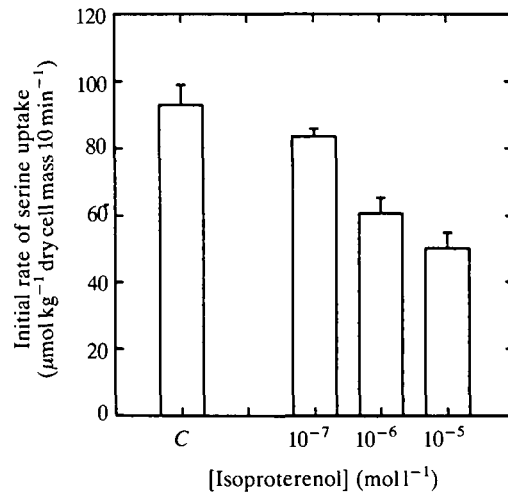

Fig. 6. Effect of isoproterenol at three different concentrations on  $150 \mu\text{mol l}^{-1}$  L-serine uptake by trout RBCs. C is the control. Cells were incubated for 10 min. Each bar is the mean of three individual experiments. Bars are standard deviation of the mean.

these cells take up sodium one-for-one with  $\text{Cl}^-$ , as well as by  $\text{Na}^+/\text{H}^+$  and  $\text{Cl}^-/\text{HCO}_3^-$  exchange (Nikinmaa and Huestis, 1984; Cossins and Richardson, 1985; Nikinmaa, 1990). This sodium-increasing effect at physiological concentrations of adrenergic agonists seems to be exclusive to fish RBCs (Nikinmaa and Huestis, 1984).

The presence of different concentrations of isoproterenol ( $10^{-7}$ – $10^{-5} \text{ mol l}^{-1}$ ) in the suspension medium had an inhibitory effect on the L-serine uptake; the effect was dose-dependent (Fig. 6).

It has been proposed that  $\beta$  effects of catecholamines on fish RBCs operate by raising the intracellular levels of cyclic AMP. When  $0.5 \text{ mmol l}^{-1}$  8-bromocyclic AMP (a phosphodiesterase-resistant cyclic AMP analogue) was added to the cells, before the addition of amino acid to obviate its slow diffusion rate, a fall in the rate of uptake was observed (data not shown). No additive effects between cyclic AMP and isoproterenol were observed, suggesting that the effect of the  $\beta$ -analogue on L-serine transport is mediated by a rise in the cyclic AMP level.

Two possible mechanisms may be responsible for the effect of isoproterenol on the L-serine uptake. Catecholamines change the intracellular sodium concentration (Nikinmaa and Tufts, 1989), leading to a change in the sodium electrochemical gradient, which acts as the driving force for the amino acid internalization. A similar situation has been observed in the transport of L-alanine by isolated rat hepatocytes when the transmembrane  $\text{Na}^+$  electrochemical gradient is eliminated by gramicidin D (Kristensen and Folke, 1986). An alternative (but not exclusive) explanation is the well-known effect of volume-induced changes in amino acid efflux, described for skate (*Raja erinacea*) (Goldstein, 1989; Goldstein



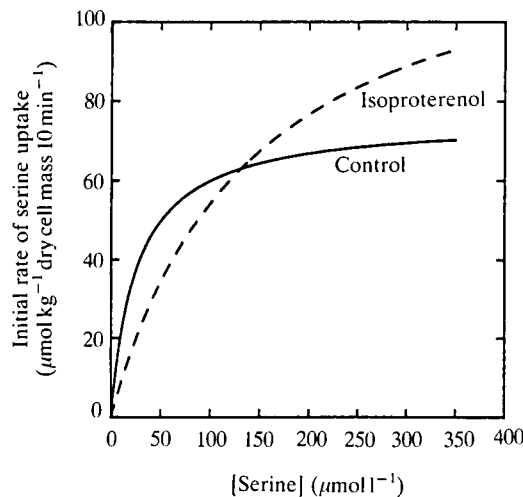

Fig. 7. Effect of  $10^{-6} \text{ mol l}^{-1}$  isoproterenol on the concentration dependence of sodium-dependent L-serine uptake by trout RBCs. Values were obtained as in Fig. 2. Cells were incubated for 10 min with MCB or with MCB plus isoproterenol. Kinetic constants are given in the text. These curves are equivalent to those shown in Fig. 2 and show the difference between total and sodium-independent serine uptake.

and Brill, 1990), eel (*Anguilla japonica*) and starry flounder (*Platichthys stellatus*) (Fincham *et al.* 1987) erythrocytes. Hypo-osmotic or iso-osmotic cell swelling increased the rate of release of taurine from these cells.

Adrenergic stimulation of salmonid RBCs can acidify the extracellular medium, although only by 0.1 pH unit, when  $10 \text{ mmol l}^{-1}$  HEPES is used as the buffer (Motais *et al.* 1989). Such a change may contribute to a drop in the rate of uptake of the amino acid such as that shown in Fig. 6.

The effect of  $10^{-6} \text{ mol l}^{-1}$  isoproterenol on the concentration dependence of the L-serine uptake was studied. Results shown in Fig. 7 indicated that the  $\beta$ -agonist induced a rise in the apparent  $K_m$  of the sodium-dependent uptake (from  $26.06 \mu\text{mol l}^{-1}$  for control cells to  $139.43 \mu\text{mol l}^{-1}$  for isoproterenol-treated cells).  $V_{\text{max}}$  was also affected by isoproterenol, rising from  $75.88$  to  $127.87 \mu\text{mol kg}^{-1} \text{ dry mass } 10 \text{ min}^{-1}$ .

The influence of isoproterenol on the sodium-dependent L-serine uptake should be measured for the incorporation of other amino acids into fish RBCs, although this has not been investigated here. It is known that catecholamines exert a gluconeogenic effect in the trout liver (Wright *et al.* 1989). Moreover, some amino acids (e.g. L-serine and L-alanine) may act as gluconeogenic substrates (Walton and Cowey, 1982) or as oxidative substrates in fish (French *et al.* 1981). Thus, it is suggested that, under stressful conditions, whatever the mechanism may be, the concentration of amino acids in the RBCs may fall, facilitating their uptake by the liver or other organs to obtain glucose and/or energy. One question, at present being investigated, is whether there is a change, induced by isoproterenol, in the equilibrium concentrations of amino acids within the erythrocytes.

It is interesting that both CO<sub>2</sub> and glucose production by trout hepatocytes are higher when L-serine instead of L-alanine is used as substrate (French *et al.* 1981). However, to our knowledge, an increase in the amino acid uptake by fish liver or other cells following adrenergic stimulation has not been demonstrated.

This work was supported in part by a grant from the Comisión Interministerial de Ciencia y Tecnología (PB86-0054) of the Spanish Government. M.A.G. is a recipient of a fellowship from the Generalitat de Catalunya. We would like to express our sincere thanks to Mr Antonino Clemente (Piscifactoria de Bagà, Medi Natural, Generalitat de Catalunya) for his help and logistical assistance and to Mr Robin Rycroft for his editorial help.

### References

- BALLATORI, N. AND BOYER, J. L. (1988). Characteristics of L-alanine uptake in freshly isolated hepatocytes of elasmobranch *Raja erinacea*. *Am. J. Physiol.* **254**, R801–R808.
- BAROIN, A., GARCÍA-ROMEU, F., LAMARRE, T. AND MOTAIS, R. (1984). Hormone-induced co-transport with specific pharmacological properties in erythrocytes of rainbow trout, *Salmo gairdneri*. *J. Physiol., Lond.* **250**, 137–157.
- CHRISTENSEN, H. N. (1982). Interorgan amino acid nutrition. *Physiol. Rev.* **62**, 1193–1233.
- CHRISTENSEN, H. N., LIANG, M. AND ARCHER, E. G. (1967). A distinct Na<sup>+</sup>-requiring transport system for alanine, L-serine, cysteine and similar amino acids. *J. biol. Chem.* **242**, 5237–5246.
- COSSINS, A. R. AND RICHARDSON, P. A. (1985). Adrenalin-induced Na<sup>+</sup>/H<sup>+</sup> exchange in trout erythrocytes and its effects upon oxygen-carrying capacity. *J. exp. Biol.* **118**, 229–246.
- EAVENSON, E. AND CHRISTENSEN, H. N. (1967). Transport systems for neutral amino acids in the pigeon erythrocyte. *J. biol. Chem.* **242**, 5386–5396.
- ELLORY, J. C., PRESTON, R. L. AND YOUNG, J. D. (1983). Transport of amino acids for glutathione biosynthesis in human and dog red cells. *Biomed. biochim. Acta* **42**, S48–S52.
- FINCHAM, D. A., MASON, D. K. AND YOUNG, J. D. (1985). Characterization of a novel Na<sup>+</sup>-independent amino acid transporter in horse erythrocytes. *Biochem. J.* **227**, 13–20.
- FINCHAM, D. A., WOLOWYK, M. W. AND YOUNG, J. D. (1987). Volume-sensitive taurine transport in fish erythrocytes. *J. Membr. Biol.* **96**, 45–46.
- FINCHAM, D. A., WOLOWYK, M. W. AND YOUNG, J. D. (1990). Characterisation of amino acid transport in red blood cells of a primitive vertebrate, the Pacific hagfish (*Eptatretus stouti*). *J. exp. Biol.* **154**, 355–370.
- FRENCH, C. J., MOMMSEN, T. P. AND HOCHACHKA, P. W. (1981). Amino acid utilisation in isolated hepatocytes from rainbow trout. *Eur. J. Biochem.* **113**, 311–317.
- GOLDSTEIN, L. (1989). Volume regulation in the erythrocyte of little skate, *Raja erinacea*. *J. exp. Zool. (Suppl. 2)*, 136–142.
- GOLDSTEIN, L. AND BOYD, T. (1978). Regulation of β-alanine transport in skate (*Raja erinacea*) erythrocytes. *Comp. Biochem. Physiol.* **66**, 319–325.
- GOLDSTEIN, L. AND BRILL, S. (1990). Isoosmotic swelling of skate (*Raja erinacea*) red blood cells causes a volume regulatory release of intracellular taurine. *J. exp. Zool.* **253**, 132–138.
- HOUSTON, A. H., MCCULLOUGH, C. A. M., KEEN, J., MADDALENA, C. AND EDWARDS, J. (1985). Rainbow trout red cells *in vitro*. *Comp. Biochem. Physiol.* **81A**, 555–565.
- KILBERG, M. S., HANDLOGTEN, M. E. AND CHRISTENSEN, H. N. (1981). Characteristics of system ASC for transport of neutral amino acids in the isolated rat hepatocyte. *J. biol. Chem.* **256**, 3304–3312.
- KRISTENSEN, L. O. AND FOLKE, M. (1986). Effects of perturbation of the Na<sup>+</sup> electrochemical gradient on influx and efflux of alanine in isolated rat hepatocytes. *Biochim. biophys. Acta* **855**, 49–57.
- LE CAM, A. AND FREYCHET, P. (1977). Neutral amino acid transport. Characterization of the A and L systems in isolated rat hepatocytes. *J. biol. Chem.* **252**, 148–157.

- MAHÉ, Y., GARCÍA-ROMEU, P. AND MOTAIS, R. (1985). Inhibition by amiloride of both adenylate cyclase activity and the  $\text{Na}^+/\text{H}^+$  antiporter in fish erythrocytes. *Eur. J. Pharmac.* **116**, 199–206.
- MOTAIS, R., FIEVET, B., GARCÍA-ROMEU, F. AND THOMAS, S. (1989).  $\text{Na}^+-\text{H}^+$  exchange and pH regulation in red blood cells: role of uncatalyzed  $\text{H}_2\text{CO}_3$  dehydration. *Am. J. Physiol.* **256**, C728–C735.
- NIKINMAA, M. (1990). *Vertebrate Red Blood Cells*. Berlin, Heidelberg, New York: Springer Verlag.
- NIKINMAA, M. AND HUESTIS, W. H. (1984). Adrenergic swelling of nucleated erythrocytes: cellular mechanisms in a bird, domestic goose, and two teleosts, striped bass and rainbow trout. *J. exp. Biol.* **113**, 215–224.
- NIKINMAA, M. AND TUFTS, B. L. (1989). Regulation of acid and ion transfer across the membrane of nucleated erythrocytes. *Can. J. Zool.* **67**, 3039–3045.
- RISTORI, M. T. AND LAURENT, P. (1985). Plasma catecholamines and glucose during moderate exercise in the trout: comparison with bursts of violent activity. *Expl Biol.* **44**, 247–253.
- SEPULVEDA, F. V. AND ROBINSON, J. W. L. (1974). Harmaline, a potent inhibitor of sodium-dependent transport. *Biochem. biophys. Acta* **373**, 527–531.
- SHOTWELL, M. A., JAYME, D. W., KILBERG, M. S. AND OXENDER, D. L. (1981). Neutral amino acid transport systems in Chinese hamster ovary cells. *J. biol. Chem.* **256**, 5422–5427.
- SHOTWELL, M. A., KOLBERG, M. S. AND OXENDER, D. L. (1983). The regulation of neutral amino acid transport in mammalian cells. *Biochim. biophys. Acta* **737**, 267–284.
- TETENS, V. AND CHRISTENSEN, N. J. (1987).  $\beta$ -Adrenergic control of blood oxygen affinity in acutely hypoxia exposed rainbow trout. *J. comp. Physiol. B* **157**, 667–675.
- THOMAS, E. L. AND CHRISTENSEN, H. N. (1971). Nature of the cosubstrate action of  $\text{Na}^+$  and neutral amino acids in a transport system. *J. biol. Chem.* **256**, 1682–1688.
- TUCKER, E. M. AND YOUNG, J. D. (1981). Biochemical changes during reticulocyte maturation in culture: a comparison of genetically different sheep erythrocytes. *Biochem. J.* **192**, 33–39.
- VADGAMA, J. V. AND CHRISTENSEN, H. N. (1985). Discrimination of  $\text{Na}^+$ -independent transport systems, L, T, and ASC in erythrocytes.  $\text{Na}^+$  independence of the latter a consequence of cell maturation? *J. biol. Chem.* **260**, 2912–2921.
- WALTON, M. J. AND COWEY, C. B. (1982). Aspects of intermediary metabolism in salmonid fish. *Comp. Biochem. Physiol.* **73A**, 59–79.
- WHEELER, K. P. AND CHRISTENSEN, H. N. (1967). Role of  $\text{Na}^+$  in the transport of amino acids in rabbit red cells. *J. biol. Chem.* **242**, 1450–1457.
- WINTER, C. G. AND CHRISTENSEN, H. N. (1965). Contrasts in neutral amino acid transport by rabbit erythrocytes and reticulocytes. *J. biol. Chem.* **240**, 3594–3600.
- WRIGHT, P. A., PERRY, S. F. AND MOON, T. W. (1989). Regulation of hepatic gluconeogenesis and glycogenolysis by catecholamines in rainbow trout during environmental hypoxia. *J. exp. Biol.* **147**, 169–188.
- YOUNG, J. D., MASON, D. K. AND FINCHAM, D. A. (1988). Topographical similarities between harmaline inhibition sites on  $\text{Na}^+$ -dependent amino acid transport system ASC in human erythrocytes and  $\text{Na}^+$ -independent system asc in horse erythrocytes. *J. biol. Chem.* **263**, 140–143.
- YOUNG, J. D., WOLOWYK, M. W., JONES, S. E. M. AND ELLORY, J. C. (1983). Red-cell amino acid transport. Evidence for the presence of system ASC in mature red blood cells. *Biochem. J.* **216**, 349–357.
